# Supplementary material for: Activity and deactivation of Ru supported on La1.6Sr0.4NiO4 perovskite-like catalysts prepared by different methods for decomposition of N2O
Source: Royal Society of Chemistry journal article supplement (doi:10.1039/c6cy01920j), 2016-01-01
Supplement: c6cy01920j1.pdf [file c6cy01920j1.pdf]

## Supplementary Information

### Activity and Deactivation of Ru supported on $\text{La}_{1.6}\text{Sr}_{0.4}\text{NiO}_4$ perovskite-like catalyst prepared by different methods for decomposition of $\text{N}_2\text{O}$

Chao Sui<sup>a</sup>, Xiaoyu Niu<sup>b</sup>, Zhuo Wang<sup>a</sup>, Fulong Yuan<sup>\*a</sup>, Yujun Zhu<sup>\*a</sup>

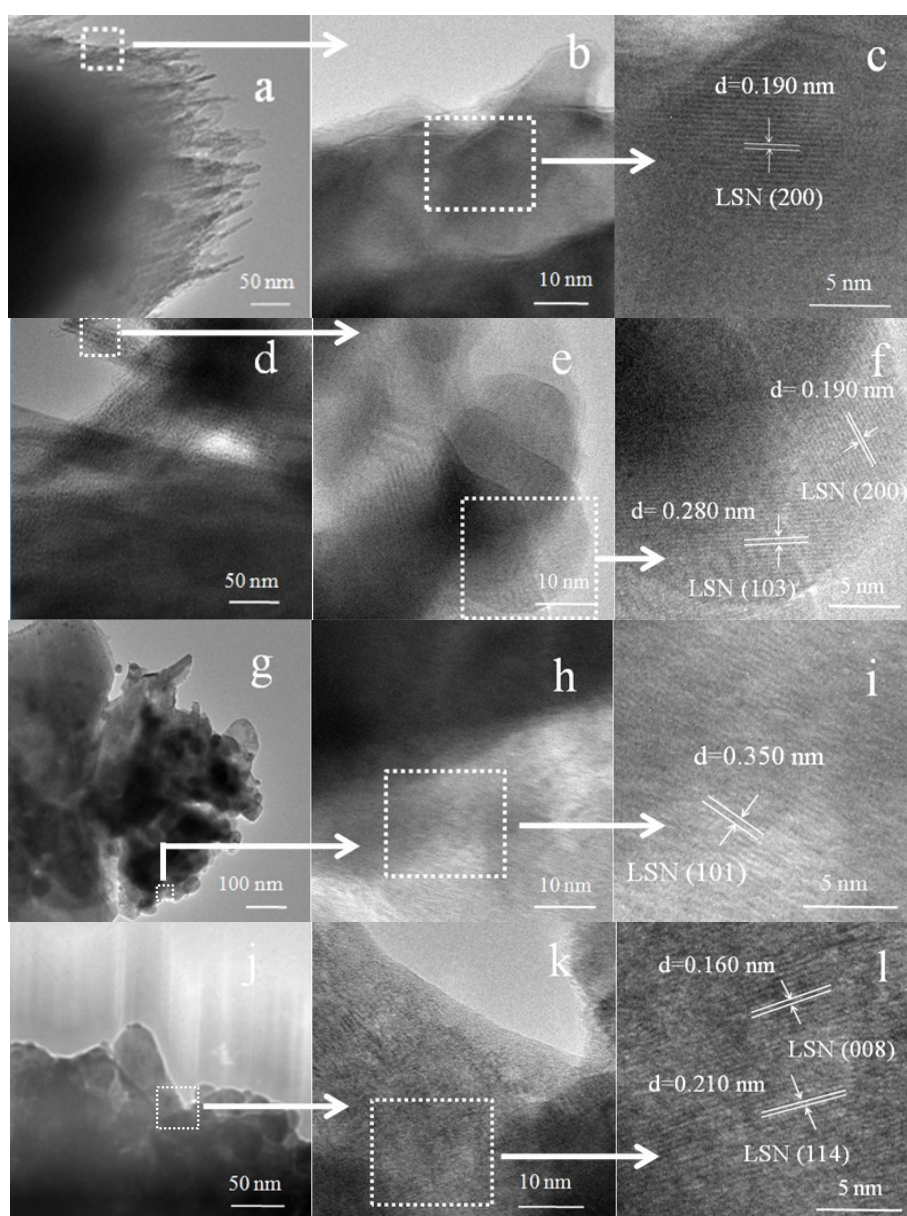

Fig. S1 TEM profiles of (a, b, c, d, e, f) of Ru/LSN and (g, h, i, j, k, l) of Ru/LSN-EG.

Table S1 Conversion of N<sub>2</sub>O over different Ru-based catalysts

| Catalysts                         | Ru Content (%) | T <sub>50%</sub> (°C) | Reaction conditions                         | GHSV (h <sup>-1</sup> )                            | References   |
|-----------------------------------|----------------|-----------------------|---------------------------------------------|----------------------------------------------------|--------------|
| Ru/LSN                            | 0.2            | 300                   | 1700 ppm N <sub>2</sub> O, 3%O <sub>2</sub> | 14000                                              | In this work |
| Ru/Al <sub>2</sub> O <sub>3</sub> | 0.95           | 410                   | 500 ppm N <sub>2</sub> O, 3%O <sub>2</sub>  | 56000                                              | 13           |
|                                   | 2              | 375                   | 500 ppm N <sub>2</sub> O                    | 56000                                              | 34           |
|                                   |                | 440                   | 500 ppm N <sub>2</sub> O, 5%O <sub>2</sub>  | 56000                                              | 34           |
| Ru/r-TiO <sub>2</sub>             | 5              | 260                   | 30000 ppm N <sub>2</sub> O                  | WHSV: 30000<br>mL/g <sup>-1</sup> h <sup>-1</sup>  | 15           |
| Ru/a-TiO <sub>2</sub>             | 5              | 300                   | 30000 ppm N <sub>2</sub> O                  | WHSV: 30000<br>mL/g <sup>-1</sup> h <sup>-1</sup>  | 15           |
| Ru/MgO                            | 0.93           | >500                  | 1000 ppm N <sub>2</sub> O                   | 24000                                              | 26           |
| Ru/CeO <sub>2</sub>               | 0.19           | 480                   | 1000 ppm N <sub>2</sub> O                   | 24000                                              | 26           |
| Ru/SiO <sub>2</sub>               | 1.14           | 350                   | 1000 ppm N <sub>2</sub> O                   | 24000                                              | 26           |
| Ru/FER                            | 0.45           | 340                   | 1500 ppm N <sub>2</sub> O, 400ppm NO        | 60000                                              | 65           |
| Ru/MCM-41                         | 0.20           | 437                   | 3300 ppm N <sub>2</sub> O                   | WHSV: 100000<br>mL/g <sup>-1</sup> h <sup>-1</sup> | 66           |
| Ru/Beta                           | 0.29           | 367                   | 3300 ppm N <sub>2</sub> O                   | WHSV: 100000<br>mL/g <sup>-1</sup> h <sup>-1</sup> | 66           |
| Rh/Al <sub>2</sub> O <sub>3</sub> | 0.5            | 340                   | 1000 ppm N <sub>2</sub> O                   | 10000                                              | 67           |
| Rh/SiO <sub>2</sub>               | 0.5            | 372                   | 1000 ppm N <sub>2</sub> O                   | 26500                                              | 68           |
| Pd/Al <sub>2</sub> O <sub>3</sub> | 0.5            | >500                  | 1000 ppm N <sub>2</sub> O                   | 10000                                              | 67           |
| Pd/CeO <sub>2</sub>               | 0.5            | 475                   | 1000 ppm N <sub>2</sub> O                   | 10000                                              | 67           |
| Pt/CeO <sub>2</sub>               | 0.5            | 460                   | 1000 ppm N <sub>2</sub> O                   | 10000                                              | 67           |
| Pt/Al <sub>2</sub> O <sub>3</sub> | 0.5            | >500                  | 1000 ppm N <sub>2</sub> O                   | 10000                                              | 67           |
| Ir/Al <sub>2</sub> O <sub>3</sub> | 5              | 375                   | 30000 ppm N <sub>2</sub> O                  | 30000                                              | 29           |

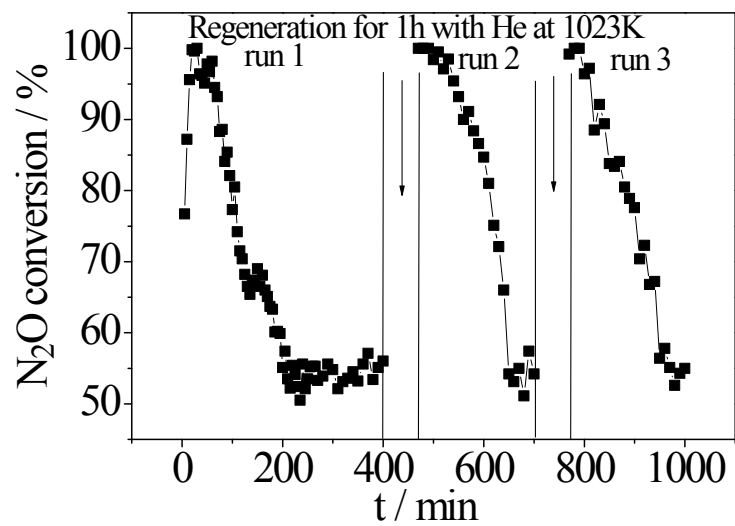

Fig. S2 regeneration experiment of Ru/LSN catalyst after the deactivation.

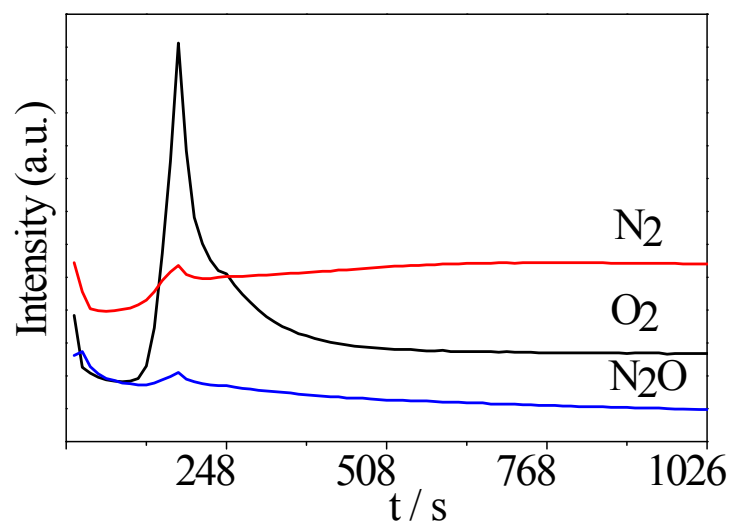

Fig. S3 Online MS curve in the process of heating treatment over Ru/LSN catalyst at 750 °C.
